# Supplementary material
Source: PubMed Central journal article supplement (PMC6602114)
Supplement: Supp_Fig1.pdf [file Supp_Fig1.pdf]

## Supplementary Data

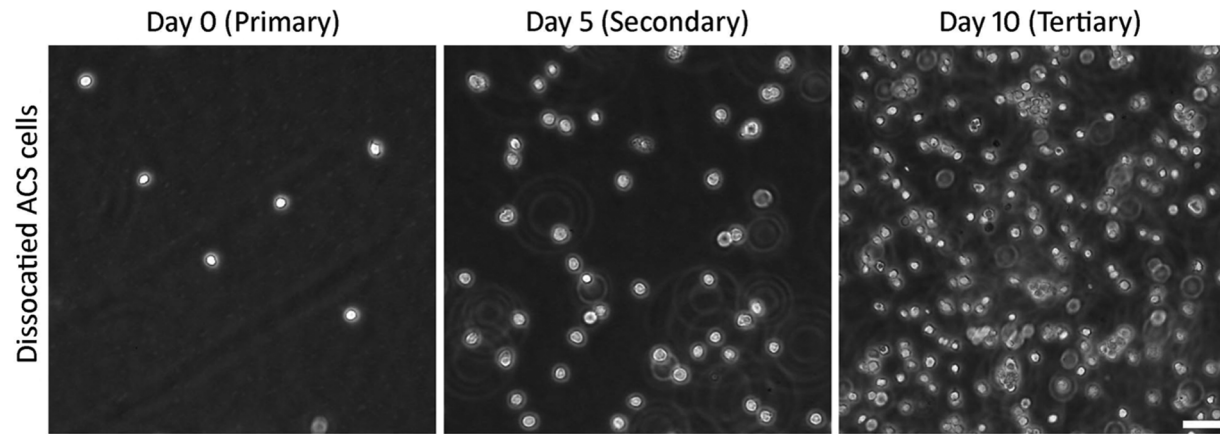

**SUPPLEMENTARY FIG. S1.** Dissociated cells of primary, secondary, and tertiary ACS. Phase contrast microscope images show dissociated ACS cells on experimental day 0 (dissociated primary culture cells), day 5 (dissociated secondary culture cells), and day 10 (dissociated tertiary culture cells). Scar bar: 50  $\mu\text{m}$ . ACS, auditory cortex-derived sphere.
