# Supplementary material
Source: PubMed Central journal article supplement (PMC6602114)
Supplement: Supp_Fig2.pdf [file Supp_Fig2.pdf]

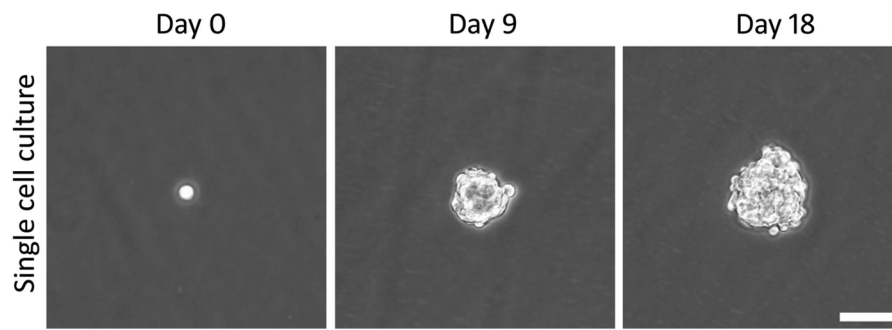

**SUPPLEMENTARY FIG. S2.** Single-cell culture of the ACT-derived cells. Phase contrast microscope images show a single cell that was dissociated from ACTs can proliferate and form a spherical structure at day 9. The cell sphere becomes larger at day 18. Scale bar: 50  $\mu\text{m}$ . ACT, auditory cortex tissue.
