# Supplementary material
Source: PubMed Central journal article supplement (PMC6602114)
Supplement: Supp_Fig3.pdf [file Supp_Fig3.pdf]

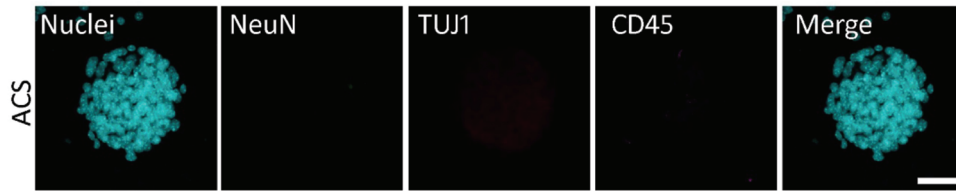

**SUPPLEMENTARY FIG. S3.** The ACS does not express neuronal and hematopoietic proteins. Confocal microscope images show that the ACS does not express TUJ1 (neuron marker), NeuN (mature neuron marker), or CD45 (hematopoietic cell marker). Scale bar: 50  $\mu$ m.
