# Supplementary material
Source: PubMed Central journal article supplement (PMC6602114)
Supplement: Supp_Table1.pdf [file Supp_Table1.pdf]

SUPPLEMENTARY TABLE S1. PRIMERS FOR REAL-TIME POLYMERASE CHAIN REACTION

| <i>Gene</i>    | <i>Accession no.</i> | <i>Primer sequences (5'-3')</i> |                           | <i>T<sub>m</sub></i><br>(°C) | <i>Product</i><br><i>length (bp)</i> |
|----------------|----------------------|---------------------------------|---------------------------|------------------------------|--------------------------------------|
|                |                      | <i>Forward</i>                  | <i>Reverse</i>            |                              |                                      |
| <i>Gapdh</i>   | NM_008084.3          | GGCCGCATCTTCTTGTGCAGT           | TTCTCGGCCTTGACTGTGCCGTT   | 62                           | 229                                  |
| <i>Sox2</i>    | NM_011443.4          | GCGGAGTGGAAACTTTTGTCC           | CGGGAAGCGTGTACTIONTATCCTT | 57                           | 219                                  |
| <i>Nes</i>     | NM_016701.3          | CCCTGAAGTCGAGGAGCTG             | CTGCTGCACCTCTAAGCGA       | 59                           | 306                                  |
| <i>Tubb3</i>   | NM_023279.2          | TCAGGCCCGACAACCTTATCT           | ACACTCTTTCCGCACGACAT      | 57                           | 119                                  |
| <i>Neurod1</i> | NM_010894.2          | AGCCCTGATCTGGTCTCCTT            | AAAGTCCGAGGGTTGAGCTG      | 59                           | 101                                  |
| <i>Psd93</i>   | NM_011807.3          | GACCAGTCATTCCCAGCACA            | CACCGGCCAGAATGAAGGAT      | 59                           | 144                                  |
