# Supplementary material
Source: PubMed Central journal article supplement (PMC6602114)
Supplement: Supp_Table2.pdf [file Supp_Table2.pdf]

SUPPLEMENTARY TABLE S2. ANTIBODIES  
LIST FOR IMMUNOFLUORESCENCE

| <i>Name</i> | <i>Dilution</i> | <i>Company</i> | <i>Catalog no.</i> |
|-------------|-----------------|----------------|--------------------|
| NESTIN      | 1:400           | DSHB           | Rat-401            |
| SOX2        | 1:200           | R&D            | AF2018             |
| TUJ1        | 1:500           | Aves           | TUJ                |
| NEUN        | 1:200           | Aves           | NUN                |
| Neurod1     | 1:200           | Santa Cruz     | sc-46684           |
| NEFL        | 1:1000          | Santa Cruz     | sc-20012           |
| Na-V        | 1:200           | Millipore      | SAB4502713         |
| MOG         | 1:100           | Millipore      | MAB5680            |
| GFAP        | 1:200           | Santa Cruz     | sc-6170            |
| A2B5        | 1:1000          | R&D            | MAB1416            |
| CD45        | 1:500           | BD             | 550539             |
| SV2-a       | 1:200           | DSHB           | SV2                |
| SYNAPSIN    | 1:200           | SANTA CRUZ     | sc-8295            |
| PSD93       | 1:200           | Neuomab        | 73-057             |
